# Supplementary material for: TMPRSS2 expression dictates the entry route used by SARS‐CoV‐2 to infect host cells
Source: PubMed Central journal article supplement — EMBO J. 2021 Jul 13;40(16):e107821. doi: 10.15252/embj.2021107821 (PMC8365257; doi:10.15252/embj.2021107821), 2021-07-13
Supplement: EMBJ-40-e107821-s005.pdf [file EMBJ-40-e107821-s005.pdf]

## Table of contents

| <b>Supplemental data figures</b>                                                                         | <b>page</b> |
|----------------------------------------------------------------------------------------------------------|-------------|
| Figure S1 - Kinetic of SARS-CoV-2 infection<br>(related to Fig. 1)                                       | 2           |
| Figure S2 - Aprotinin inhibits SARS-CoV-2 infection in TMPRSS2+ cells<br>(related to Fig. 2)             | 3           |
| Figure S3 - SB412515 impairs SARS-CoV-2 infection in TMPRSS2- cells<br>(related to Fig. 2)               | 4           |
| Figure S4 - Drug cytotoxicity in A549*, Vero, Calu-3, and Caco-2 cells<br>(related to Fig. 2 to 5 and 8) | 5           |
| Figure S5 - SARS-CoV-2-mediated cell-cell fusion in A549* cells<br>(related to Fig. 6 and 7)             | 6           |
| Figure S6 - SARS-CoV-2-mediated cell-cell fusion in Vero cells<br>(related to Fig. 6 and 7)              | 7           |

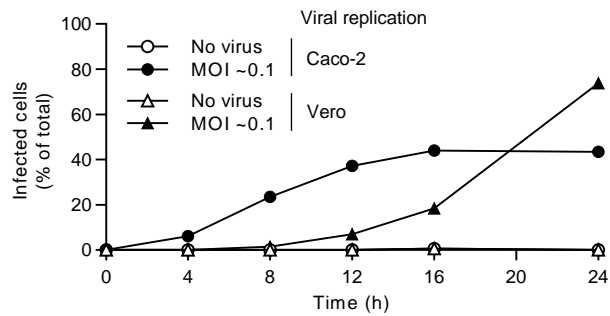

**Appendix Figure S1. Kinetic of SARS-CoV-2 infection.**

Infection of Caco-2 and Vero cells was monitored over 24 h using the same flow cytometry-based assay used for the experiment shown in Fig. 1E. Infection is given as the percentage of SARS-CoV-2 NP-positive cells (percent of total cells). n = 3.

Data information: Results are representative of 3 independent experiments and expressed as mean ± SEM from 3 biological replicates.

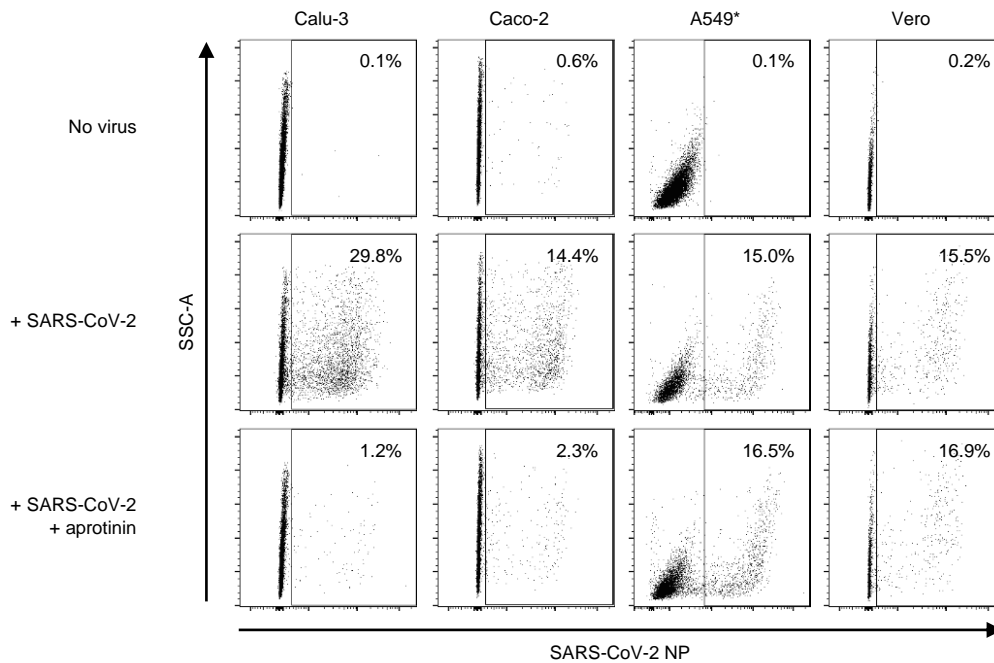

**Appendix Figure S2. Aprotinin inhibits SARS-CoV-2 infection in TMPRSS2+ cells.** Calu-3, Caco-2, A549\*, and Vero cells were pretreated with aprotinin at 5  $\mu$ M, and subsequently infected with SARS-CoV-2 at MOIs of 0.3, 0.4, 0.2, and 0.3, respectively, in the continuous presence of the drug. Infected cells were quantified by flow cytometry as described in Fig. 1D.

Data information: data are representative of many independent experiments.

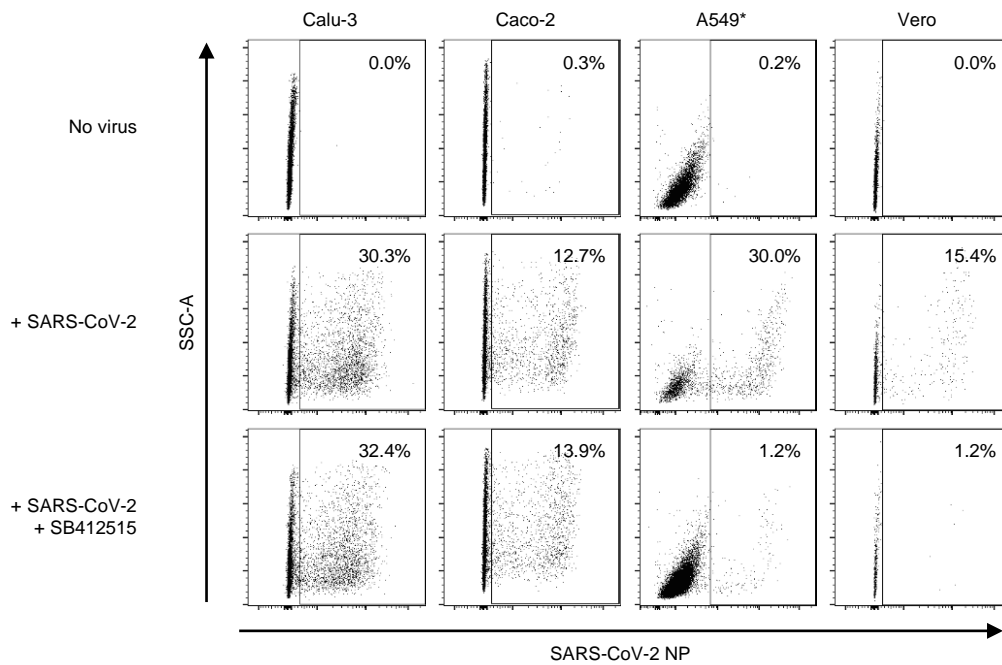

**Appendix Figure S3. SB412515 impairs SARS-CoV-2 infection in TMPRSS2-cells.** Calu-3, Caco-2, A549\*, and Vero cells were pretreated with SB412515 at 2.5  $\mu$ M, and subsequently infected with SARS-CoV-2 at MOIs of 0.3, 0.4, 0.2, and 0.3, respectively, in the continuous presence of the drug. Infected cells were quantified by flow cytometry as described in Fig. 1D.

Data information: data are representative of many independent experiments.

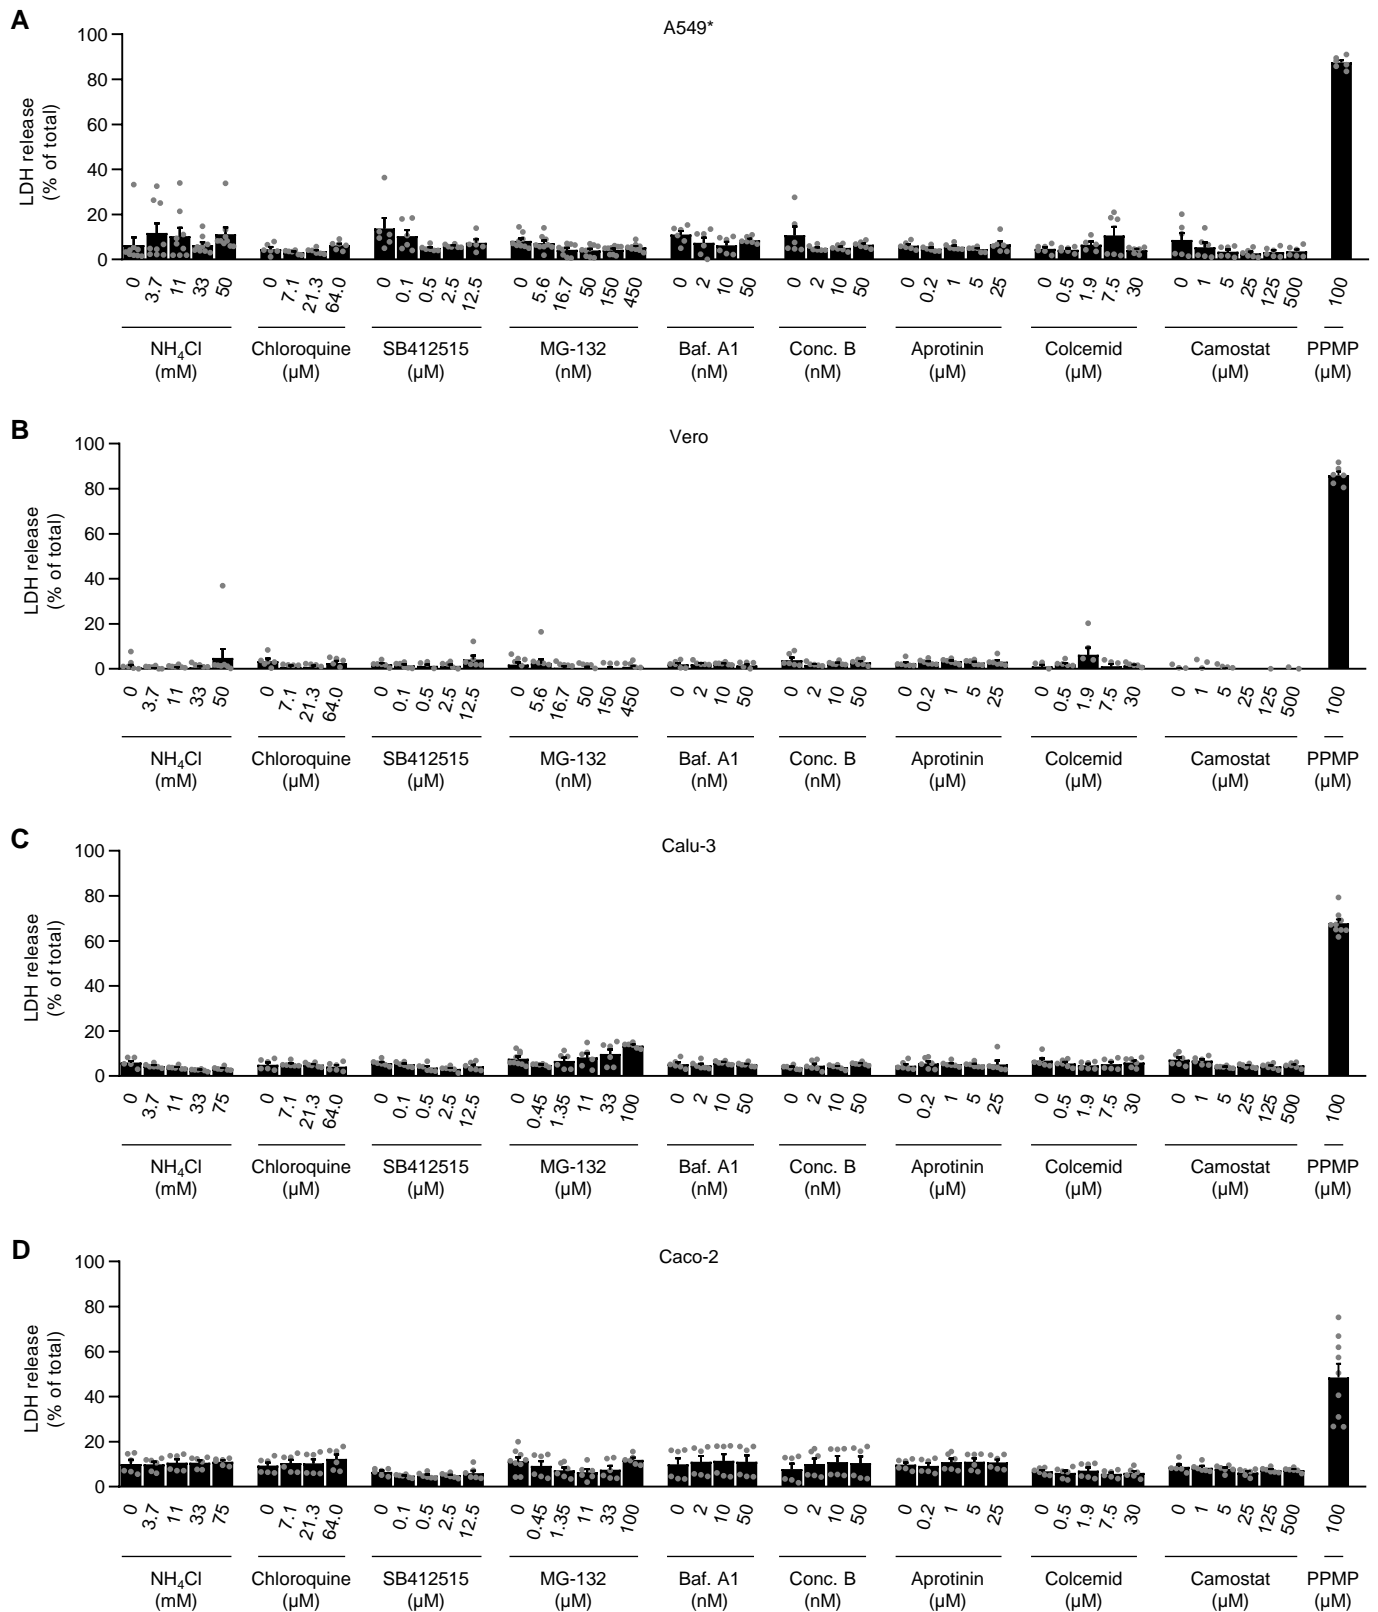

**Appendix Figure S4. Drug cytotoxicity in A549\*, Vero, Calu-3, and Caco-2 cells.** (A to D) Assessment of cytotoxicity of drugs in the range of concentrations applied to A549\*, Vero, Calu-3, and Caco-2 cells for 9 h at 37°C using the CytoTox96 Non-Radioactive Cytotoxicity colorimetric assay (Promega). PPMP, a ceramide analog that impairs ceramide maturation and cell membrane integrity, was used as a positive control. Values were normalized to those of untreated cells after lysis, which corresponds to the maximum possible release of lactate dehydrogenase into the extracellular medium. Baf. A1, bafilomycin A1; Conc. B, concanamycin B. n = 5-9.

Data information: data are expressed as mean ± SEM from 2 independent experiments.

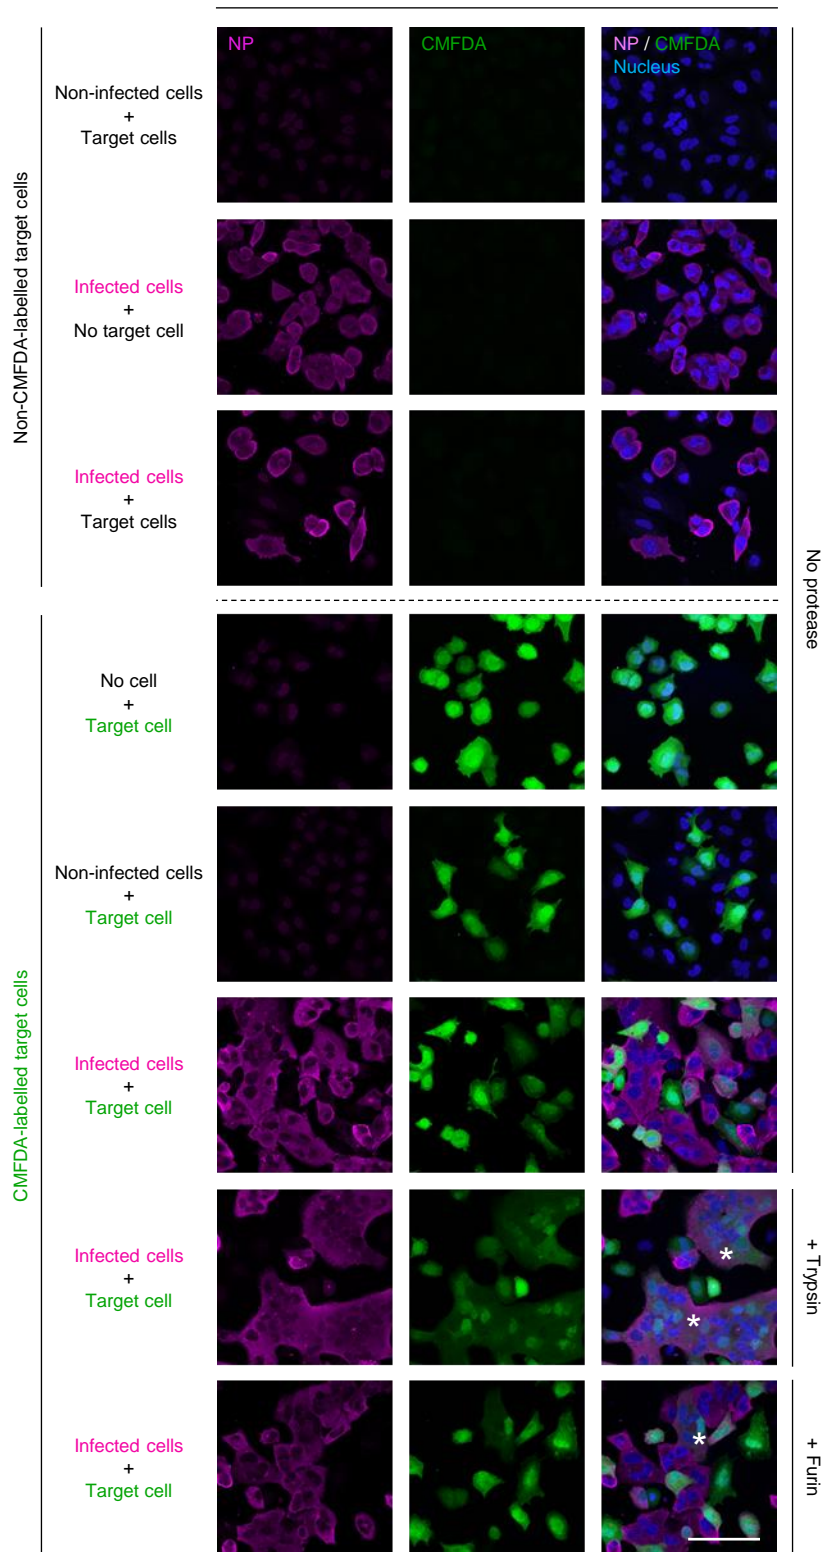

**Appendix Figure S5. SARS-CoV-2-mediated cell-cell fusion in A549\* cells.** A549\* cells were first infected with SARS-CoV-2 at an MOI of  $\sim 0.1$  for 24 h and cocultured for 5 h along with target cells, which were not infected with SARS-CoV-2 but had been prestained with CMFDA, a cytosolic green dye. Cells were subsequently treated with trypsin or furin for 5 min at 37°C and left to coculture for an additional hour at 37°C. After fixation, nuclei were stained with Hoechst (blue), and infected cells were subjected to immunofluorescence staining against SARS-CoV-2 nucleoprotein (magenta). Samples were imaged by confocal fluorescence microscopy. White stars indicate syncytia with at least four nuclei. **Scale bar: 100  $\mu$ m.**

Data information: images are representative of 3 independent experiments.

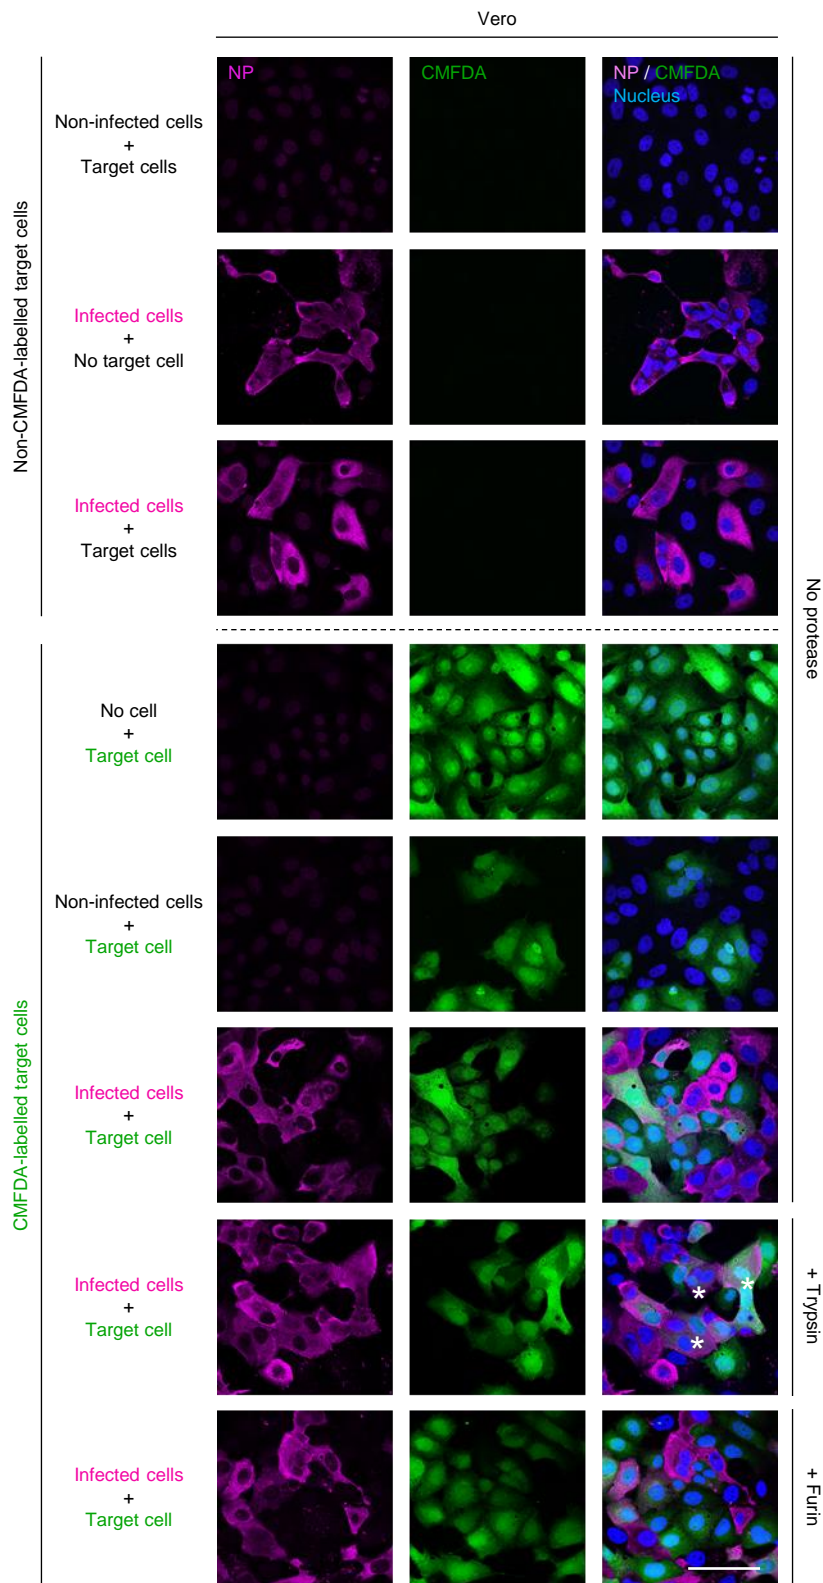

**Appendix Figure S6. SARS-CoV-2-mediated cell-cell fusion in Vero cells.** Vero cells were first infected with SARS-CoV-2 at an MOI of  $\sim 0.2$  for 24 h and cocultured for 5 h along with target cells, which were not infected with SARS-CoV-2 but had been prestained with CMFDA, a cytosolic green dye. Cells were subsequently treated with trypsin or furin for 5 min at 37°C and left to coculture for an additional hour at 37°C. After fixation, nuclei were stained with Hoechst (blue), and infected cells were subjected to immunofluorescence staining against SARS-CoV-2 nucleoprotein (magenta). Samples were imaged by confocal fluorescence microscopy. White stars indicate syncytia with at least four nuclei. **Scale bar: 100  $\mu$ m.**

Data information: images are representative of 3 independent experiments.
